# Supplementary material for: Dzip1 and Fam92 form a ciliary transition zone complex with cell type specific roles in Drosophila
Source: eLife. 2019 Dec 10;8:e49307. doi: 10.7554/eLife.49307 (PMC6904220; doi:10.7554/eLife.49307)
Supplement: Supplementary file 1. — Proteins in red were specifically retrieved in both replicates with LAP-CBY1 but not with LAP-GFP. Proteins in black were specifically retrieved in only one replicate with LAP-CBY1 but not with LAP-GFP. DZIP1L and FAM92A1 are highlighted in yellow [file elife-49307-supp1.xlsx]

## Sheet: Feuil1
Table S1. Proteins identified by mass spectrometry from two rounds of LAP-tag purification. Proteins in red were specifically retrieved in both replicates with LAP-mCBY1 but not with LAP-GFP. Proteins in black were specifically retrieved in only one replicate with LAP-CBY1 but not with LAP-GFP. DZIP1L and FAM92A1 are highlighted in yellow
Accession	Gene name	Protein Name		LAP1			LAP2
				Coverage (%)	Spectral count	Unique peptide (>95%CI)	Coverage (%)	Spectral count	Unique peptide (>95%CI)
Q499E4	Dzip1l	Zinc finger protein DZIP1L		28.17	118	20	16.02	21	7
P62259	Ywhae	14-3-3 protein epsilon		53.73	112	15	45.49	57	9
Q9D1C2	Cby1	Protein chibby homolog 1		66.93	74	12	66.14	52	10
P61982	Ywhag	14-3-3 protein gamma		38.06	56	8	30.36	47	5
P63101	Ywhaz	14-3-3 protein zeta/delta		34.69	51	8	35.51	32	6
P68510	Ywhah	14-3-3 protein eta		33.74	46	7	30.49	36	4
P99024	Tubb5	Tubulin beta-5 chain		23.65	32	9	24.32	16	7
Q8BP22	Fam92a1	Protein FAM92A1		22.82	32	5	40.85	39	11
P68373	Tuba1c	Tubulin alpha-1C chain		24.05	31	7	20.27	24	7
P20029	Hspa5	78 kDa glucose-regulated protein		9.466	12	4	9.01	8	3
Q8VED5	Krt79	Keratin, type II cytoskeletal 79		19.21	86	11	19.59	176	28
Q61781	Krt14	Keratin, type I cytoskeletal 14		43.18	212	28
Q9CQV8	Ywhab	14-3-3 protein beta/alpha		24.39	44	6
P62806	Hist1h4a	Histone H4		38.83	19	5
Q9DC23	Dnajc10	DnaJ homolog subfamily C member 10		5.675	13	2
P15864	Hist1h1c	Histone H1.2		16.98	9	3
Q9Z2X1	Hnrnpf	Heterogeneous nuclear ribonucleoprotein F		8.434	9	1
Q9JJG9	Noa1	Nitric oxide-associated protein 1		2.309	6	1
Q65CL1	Ctnna3	Catenin alpha-3		1.453	6	1
P04444	Hbb-bh1	Hemoglobin subunit beta-H1		6.803	4	1
Q60865	Caprin1	Caprin-1		3.271	3	1
Q62266	Sprr1a	Cornifin-A		16.67	3	1
